# Supplementary material for: Lipidomic Biomarkers in Polycystic Ovary Syndrome and Endometrial Cancer
Source: PubMed Central journal article supplement (PMC7370092; doi:10.3390/ijms21134753), 2020-07-03
Supplement: ijms-21-04753-s001.pdf [file ijms-21-04753-s001.pdf]

## Supplementary Table

**Table S1.** Relative standard deviation (RSD%) of peak areas and retention times of a range of specific lipids representing major lipid families observed in plasma QC samples ( $n = 21$ ), which were monitored during the analysis of the study samples.

| <b>Lipid Identity</b>                   | <b><i>m/z</i></b> | <b>%RSD Peak Area</b> | <b>%RSD Retention Time</b> |
|-----------------------------------------|-------------------|-----------------------|----------------------------|
| Docosahexaenoic acid                    | 327.232           | 7.6                   | 0.62                       |
| $\alpha$ - or $\gamma$ - Linolenic acid | 277.217           | 7.3                   | 0.31                       |
| LysoPC (20:4)                           | 544.339           | 5.0                   | 1.38                       |
| Arachidonic_acid                        | 303.232           | 7.6                   | 0.55                       |
| DiHETE                                  | 335.220           | 14.5                  | 0.56                       |
| Palmitoleic acid                        | 253.217           | 7.0                   | 0.62                       |
| Docosapentaenoic acid                   | 329.248           | 9.8                   | 1.70                       |
| Linoleic acid                           | 279.232           | 9.5                   | 0.58                       |
| DHET                                    | 337.238           | 10.9                  | 0.52                       |
| Palmitic acid                           | 255.233           | 11.3                  | 0.45                       |
| Oleic acid                              | 281.248           | 11.6                  | 0.42                       |
| Heptadecanoic acid                      | 269.248           | 10.4                  | 0.41                       |
| Stearic acid                            | 283.263           | 9.8                   | 0.30                       |
| Hexacosanoic_acid                       | 395.389           | 7.3                   | 0.58                       |
| Monoacylglycerol (22:4)                 | 405.301           | 17.6                  | 0.67                       |
| Triglyceride (24:0)                     | 493.355           | 8.6                   | 0.54                       |
| Triglyceride (28:0)                     | 585.484           | 8.9                   | 0.60                       |
| Triglyceride (52:3)                     | 874.785           | 10.7                  | 0.17                       |
| CE (18:2)                               | 666.618           | 11.0                  | 0.23                       |
| LysoPC (16:0)                           | 496.340           | 7.8                   | 1.53                       |
| LysoPC (18:0)                           | 524.370           | 13.5                  | 1.70                       |
| LysoPC (18:1)                           | 522.355           | 8.4                   | 1.70                       |
| LysoPE (18:0)                           | 482.324           | 7.3                   | 1.72                       |
| LysoPE (18:1)                           | 480.309           | 6.6                   | 1.76                       |
| LysoPE (22:6)                           | 526.293           | 5.4                   | 1.63                       |
| PC (36:6)                               | 778.539           | 12.8                  | 2.37                       |
| PG (34:1)                               | 747.522           | 16.0                  | 1.39                       |
| Ceramide: (d18:1/16:0)                  | 596.526           | 9.3                   | 0.74                       |
| Testosterone sulphate                   | 367.158           | 14.1                  | 1.71                       |

LysoPC—lysophosphatidylcholine; LysoPE—lysophosphatidylethanolamine; HETE—hydroxyeicosatetraenoic acid; DHET—dihydroxyeicosatrienoic acid; PC—phosphatidylcholine; PG—phosphatidylglycerol; CE—cholesterol ester.
